# Supplementary material
Source: Springer Nature journal article supplement (https://www.springermedizin.de/resource/supplementary/12936_2007_427_MOESM1_ESM.pdf/9547426)
Supplement: MOESM1 [file 9547426]

- Field guide for pharmacokinetic sample collection and storage
- Core protocols for pharmacokinetic studies
- Pharmacopoeia of validated antimalarial drug assays
- Regional repositories able to supply laboratories with reference pure antimalarial compounds, their metabolites and appropriate internal standards, and analytical grade reagents.
- Designated reference analytical laboratories to ensure quality control in pharmacokinetic assays (including sending blinded samples to regional laboratories regularly) and to assay samples from study sites without access to reliable analytical laboratories.
- Guidelines on the statistical methods recommended for pharmacokinetic analyses
- Minimum reporting recommendations for publishing antimalarial pharmacokinetic studies
